# Supplementary material for: Identification of Cancer Related Genes Using a Comprehensive Map of Human Gene Expression
Source: PLOS journal article supplement (doi:10.1371/journal.pone.0157484), 2016-06-20

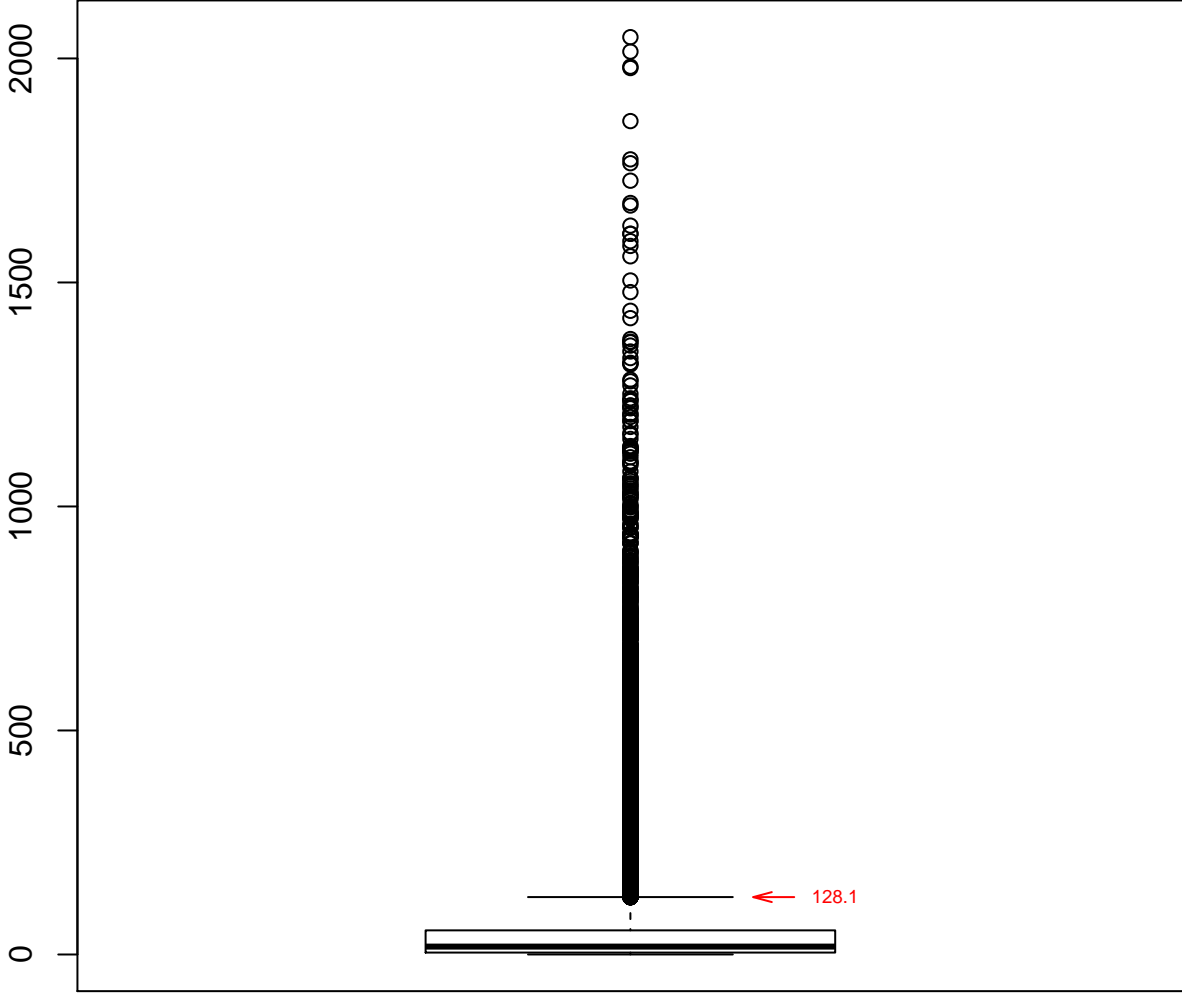

Supplement: S16 (10.1371/journal.pone.0157484.s016) [file journal.pone.0157484.s016]
